# Supplementary material for: Idraparinux versus Standard Therapy for Venous Thromboembolic Disease
Source: Atypon-hosted journal article supplement (doi:10.1056/nejmoa064247), 2007-09-13

## Supplementary Appendix

This appendix has been provided by the authors to give readers additional information about their work.

Supplement to: The van Gogh Investigators. Idraparinux versus standard therapy for venous thromboembolic disease. *N Engl J Med* 2007;357:1094-104.

## APPENDIX

**Steering Committee:** H.R. Büller, A.T. Cohen, B. Davidson, H. Decousus, A. Gallus, M. Gent, F. Piovela, M.H. Prins, G. Raskob, J. Bouthier, Ton Lensing.

**Data Safety Monitoring Board:** S. Schulman, E. Minar, G.J. Weverling

**Adjudication Committee:** M.H. Prins, D.P.M. Brandjes, S. Middeldorp, E.J.R. van Beek.

**Study Director:** G. Pillion (Sanofi-aventis), R. van Amsterdam (Organon).

**Participating investigators:**

**Argentina (66 patients, 8 centers):** F. Santini, D. Roubiseck, Mar del Plata (23); M. del Carmen Gallo, M. Ghirlanda, Buenos Aires (12); J.M. Ceressetto, Carlos Doti, Buenos Aires (13); H. Hendler, M. Hendler, Buenos Aires (9); L.D. Xavier, M. Gracias Michelini, Monte Grande (6); E.S. Vinuales Santafe, D. Penschaski, Buenos Aires (2); A. del Val, Carlos Alberto Campos, Cordoba (1).

**Australia (388 patients, 19 centers):** H. Salem, P. Coughlin, Clayton, Melbourne (85); K. Narayan, M. Leyden, Ringwood East, Melbourne, (69); E. Gan, A. Simmance, Clayton, Melbourne (44); B. Chong, T. Brighton, Kogarah, Sydney (34); I. Prosser, J. D’Rosario, P.Crispin, Garran, Canberra (33); C. Ward, L. Coyle, Sydney (32); A. Gallus, W. Coghlan, Bedford Park, Adelaide (24); M. Leahy, Fremantle, Perth (23); P. Carroll, Redcliffe, Brisbane (22); H. Gibbs, Woollongabba, Brisbane, (9); J. Waites, Coffs Harbour (8); S. Chunilal, U. Hahn, Woodville, Adelaide (5).

**Austria (85 patients, 2 centers):** E. Pilger, M. Brodmann, Graz (65); M. Baghestanian, J. Amighi, Wien (20).

**Belgium (155 patients, 13 centers):** Ph. Hainaut, Brussels (42); Ph. De Vleeschauwer, J. Duchateau, Lier (23); J.C. Wautrecht, S. Motte, Brussels (22); M. Zicot, Liège (16); J. De Leersnyder, J. Duchateau, Dufel (13); M. Delcroix, Leuven (10); V. Ninane, C. Bradstreet,

Brussels (9); R. Vossaert, Zottegem (9); F. Vermassen, Gent (5); J. Thiriaux, Charleroi (4); L. Delaunois, E. Marchand, Yvoir (2).

**Brazil (144 patients, 11 centers):** R.C. Rocha Moreira, M. Miyamoto, Curitiba (34); J.A. Costa, V.A. Ferreira, Sao Paulo (29); B. van Bellen, F.C. Carvalho, Sao Paulo (20); S. Rassi, Y. Nagato, C.N.A. Calixto, J.M.C. Kluthcouski, Goiânia (16); F.H.A. Maffei, W.B. Yoshida, Sao Paulo (15); L.C. Bodanese, E.R. Manenti, Porto Alegre (10); J.P. Esteves, M. Silveira Teixeira, Salvador (9); R.A. Caffaro, V.P. Santos, Sao Paulo (8); M.E.R. de Castro Santos, Belo Horizonte (3).

**Canada (366 patients, 25 centers):** M. Kovacs, J. Mangel, (72); P. Wells, M. Rodger, Ottawa (47); J. Douketis, T. Schurr, Hamilton (38); M.J. Mant, L. Larratt, Edmonton (33); D. Anderson, Halifax (32); E. Yeo, W. Brien, Toronto (25); M. J. Miron, F. Joyal, Montreal (22); L. Desjardins, M. Ruel, Sainte-Foy (20); A.G.G. Turpie, C. Bradley, Hamilton (19); S. Duke, R. Smith, Victoria (14); L. Vickars, P. Galbraith, Vancouver (12); T. Wong, Winnipeg (11); A. Hirsch, S.R. Khan, Montreal (12); Y. Pesant, Montigny St. Jérôme, (5); W. Geerts, R. Selby, Toronto (2); D. Rolf, M. DeLorme, Kelowna (1); A. Balsys, Weston (1).

**Czech Republic (561 patients, 17 centers):** P. Gregor, M. Penicka, Z. Kasakova, P. Stanka, Praha (119); P. Svitil, Z. Klimsa, M. Holub, Jihlava (100); R. Spacek, P. Stanka, Praha (67); V. Srnsky, R. Kratochvilova, Praha (62); P. Matoska, P. Stverak, Ostrava (57); V. Cepelak, H. Cepelavoka, V. Cechura, Plzen (41); J. Maly, J. Horacek, Hradec Kralové (30); J. Povolny, R. Stepanovova, Kladno (21); F. Patek, F. Kulic, Usti nad Labern (17); J. Vitovec, O. Hlinomaz, Brno (14); J. Chlumsky, D. Hola, Praha (13); F. Varnay, M. Patockova, Brno (12); J. Zak, B. Podzemska, Karlovy Vary (7); K. Roztocil, M. Vitovec, Praha (1).

**Denmark (106 patients, 11 centers):** P. Wille-Jorgensen; C.M. Jespersen, Copenhagen (35); H. Kraemmer Nielsen, A. Bank, Braedstrup (18); H. Ibsen, L. Petersen, Glostrup (18); K. Kjaer Pedersen, J. Hallas, Odense (9); S. Husted, B. Ziegler, Aarhus (9); S. Avnstrom, J.

Rasmussen, Copenhagen (6); T. Jakobsen, C. Tuxen, Frederiksberg (5); M. R. Lassen, H. Wroblewski, T. Lynbhoj Nielsen, Hillerod (4); P. Fruergaard, Roskilde (2);

**Finland (55 patients, 3 centers):** R. Lassila, P. Reike, Hus (37); M. Kotila, T. Kesti-Opas, Seinäjoki (13); M. Pietilä, Turku (5).

**France (445 patients, 21 centers):** H. Decousus, P. Mismetti, B. Tardy, Saint Etienne (93); D. Mottier, F. Couturaud, K. Lacut, Brest (63); E. Ferrari, M. Benhamou, Nice (35); B. Charbonnier, G. Pacouret, Tours (32), G. Simmonneau, X. Jaïs, F. Parent, A. Yaïci, Clamart (31); M. Laurent, Rennes (18); B. Agraou, Valenciennes (19); B. Crestani, G. Foulon, Paris (18); T. Meurice, A. Gay, Armentières (18); I. Quere, Montpellier (18); P. Asseman, P.V. Ennezat, Lille (16); J.P. Bassand, P. Legalery, Besançon (15); J. F. Bergmann, G. Simoneau, Paris (15); R. Deturck, C. Bergoin, Lens (12); E. Decoulx, L. Chartier, Tourcoing (9); P. Carpentier, Grenoble (9); E. Duhamel, Saint Brieuç (6); H. Boccalon, A. Bura Rivière, Toulouse (5); B. Lebeau, I. Papanikolaou-Montaville, Paris (4); H. Levesque, C. Belizna, Rouen (4); O. Equine, C. Mycinski, Béthune (2).

**Germany (202 patients, 10 centers):** S. Schellong, W.Oettler, Dresden (94); J. Harenberg, Mannheim (45); P. Grewe, T. Brodherr, Bochum (23); M. Ritter, S. Yükses, Ibbenbüren (13); A. Graf, T. Porst, Dresden (10); M. Borst, J. Meyer, Heidelberg (8) ; M. Schwaiblmair, T. Berghaus, Augsburg (6); H. Landgraf, I. Fritsche, Berlin (3).

**Greece (19 patients, 4 centers):** P. Tzardis, Athens (8); F. Kalfarentzos, Ioannis Tsolakis, Patras (7); E. Bastounis, G. Sotiris, Athens (3); D. Kiskinis, L. Ioannis, Thessaloniki (1).

**Italy (437 patients, 26 centers):** P. Prandoni, D. Tormene, Padova (70); M. Barone, C. Piovella, Pavia (59); D. Imberti, E. Croci, Piacenza (42); C. Giuntini, A. Palla, Pisa (38); A. Ghirarduzzi, M. D'inca, M. Lotti, Reggio Emilia (36); G.B. Ambrosio, C. Bortoluzzi, R. Parisi, Venezia (33); P.M. Mannucci, I. Martinelli, F. Porro, Milano (33); M. Pini, C. Godani, V. Pileggi, Fidenza (22); G. Palareti, C. Pili, Bologna (16); M. Cattaneo, F. Lussana, Milano

(14); P. Parise, G. Branca, Gubbio (14); R. Poggio, A. Shenon, Genova (12); G. Scannapieco, S. Villalta, Treviso (12); W. Ageno, F. Dentali, Varese (11); G. Ucci, C. Canovi, M. Mazzullo, Lecco (9); A. D'Angelo, A. Fattorini, (7); R. Quintavalla, C. Pattacini, Parma (6); S. Testa, A. Alatri, Cremona (3).

**Mexico (23 patients, 3 centers):** L.F. Flota, Merida (12); E. Anaya, Mexico (6); O. Reyes, L. Sanchez, Monterrey (5).

**Netherlands (685 patients, 22 centers):** J. van der Meer, J. van Ingen, Groningen (207); M. van Marwijk-Kooy, J.L.L.M. Coebe, Zwolle (95); C.A.M. de Swart, J.G. Schrama, Haarlem (52); M.H.H. Kramer, S. Wittebol, Amersfoort (47); R.J.M. van Leendert, H.W.A. Berenschot, Zwijndrecht (38); M.M.W. Koopman, V.E.A. Gerdes, I.M. Wichers, Amsterdam (35); F. L. G. Erdkamp, F.P.J. Peters, Sittard (31); J.J. Mol, V. Mattijssen, Arnhem (28); D.H. Biesma, O. de Weerd, Nieuwegein (25); T. Haitjema, W.G. Boersma, Alkmaar (24); H. Ten Cate, A. van Bellen, Maastricht (23); S. Middeldorp, M. Söhne, Amsterdam (22); K. Hamulyák, A.J. ten Cate-Hoek, Maastricht (20); C. van Guldener, J.Y. van Berkel-Mijnsbergen, Breda (10); C.D.A. Stehouwer, M.T. Nurmohamed, Amsterdam (9); T. Koster, Gouda (7); R. Hes, S.H.A. Peters, Almere (7); D.H. Biesma, O. de Weerd, Nieuwegein (5).

**New Zealand (3 patients, 1 center):** P. Ockelford, P. Harper, Auckland (3).

**Norway (56 patients, 5 centers):** P. Morten Sandset, A. Haaland, Oslo (32); A. Tveit, O. Gjesdal, Gjøttum (15); T. Amundsen, O.Hjertner, Trondheim (9).

**Poland (368 patients, 15 centers):** J. Lewczuk, K. Wrabec, W. Witkiewicz, Z. Chmielecki, Wrocław (123); Z. Rybak, A. Milnerowicz, P. Szyber, A. Rucinski, Wrocław (107); W. Tomkowski, P. Kuca, J. Kober, Warszawa (58); J. Kloczko, J. Jaromin, Białystok (18); P. Pruszczyk, M. Kostrubiec, Warszawa (14); P. Gutowski, B. Trajnacka, Szczecin (14); J. Cianciara, J. Pawelczyk, Wrocław (12); J. Wasiak, P. Czekalski, Łódź (11); J. Michalak, J.

Wronski, M. Feldo, Lublin (7); I. Krasnodebski, A. Chaber, Warszawa (2); A. Jawien, Z. Banaszkiwicz, Bydgoszcz (2).

**Portugal (57 patients, 4 centers):** N. Pinheiro, N.Pignatelli, Amadora (26); P. Alves, Lisboa (12); C. Almeida, L. Reis, Coimbra (11); M. Mendonça, A.Matos, Porto (8).

**South Africa (73 patients, 6 centers):** J. Becker, N. Welcovics, Pretoria (25); B. Warren, D.F. du Toit, Parow (24); D. Adler, D. Grolman, Bryanston (15); T. Abdool-Carim, Johannesburg (4); R.S. du Toit, R. Botha, Bloemfontein (3); R. McLennan-Smith, Durban (2).

**Spain (135 patients, 11 centers):** M.M. Bosch, Badalona (28); C. Fernandez Capitan, La Paz, Madrid (21); R. Valle, M.J. Delgado, Torrelavega (19); D.J. Castro, A. Sueiro Bendito, Madrid (17); E. Grau, F. Hernandez, Xàtiva (15); A. Blanco, P. Seguí Azpilcueta, Cordoba (10); R.B. Martin, A. Zapatero, Alcorcón (12); M.J. Paloma, M. Redondo Izal, Pamplona (8); R.O. Candelera, J.A Rodriguez-Portal, Sevilla (5);

**Sweden (176 patients, 11 centers):** G. Lärffars, E. Ottosson, L-G. Lundberg, Stockholm (51); H. Eriksson, P. Trimpou, Göteborg (36); J. Aaagesen, M. Kentson, Jonkoping (31); L. Engquist, M. Svensson, Varnamo (27); M. Holmström, A. Carlsson, Stockholm (20) T. Wallen, J. Alsenhed, Vastervik (11).

**Switzerland (10 patients, 2 centers):** H.P. Kohler, Bern (6); A. Cerny, S.Regazzoni, Lugano (4).

**United Kingdom (6 patients, 1 center):** A. Cohen, Y. Yavin, London (6).

**United States (501 patients, 67 centers):** J. Rehm, M. Gonzalez, Fredericksburg, Virginia (68); A. Spyropolous, D. Tallman, M. Wesselman, Albuquerque, New Mexico (42); B. Davidson, Seattle, Washington (26); D. Garcia, T. Harris, Albuquerque, New Mexico (20); K. Patel, M. DeGregorio, Pontiac, Michigan (21); S. Rathbun, T.IL. Whitsett, Oklahoma City, Oklahoma (19); D. Katula, E. Cordasco, Columbus, Ohio (18); W. Botnick, M. T. Pollock, Decatur, Georgia (18); A. Dalmi, W. Breitwieser, R. Paulson, Grand Forks, North Dakota (18); D.

Lorch, Brandon, Florida (16); K. Stevens, C. Tessmar, Troy, Florida (16); M. Fusco, G. Dana, Melbourne, Florida (16); W. Dittman Jr, S.G. Joseph, Spokane, Washington DC (16); L. William, Lake Charles, Louisiana (15); M.D. Cipolle, T. D. Harrison, Allentown, Pennsylvania (11); A. Jacobson, V. Simpson, Redlands, California (11); J. Muntz, S. Cochran, Houston, Texas (10); S. Moll, Chapel Hill, North California (10); J. Gossage, W.B Davis, Augusta, Georgia (10); J. Chang, La Jolla, California (8); C. Singer, L.W. King, Baltimore, Maryland (13); J. Bradley, D.P. Lawler, Olathe, Kansas (7); D. Olson, J.R. Hammersley, Toledo, Ohio (7); J. Ansell, J. Greenwald, Boston, Massachusetts (7); C.L. Anderson, S. Daniel, Bay Pines, Florida (6); W. Farra, H.W. Organek, Southfield, Michigan (6) ; D. Buffington, Tampa, Florida (5); J. Stocks, Tyler, Texas (5); E. Rivera, Amarillo, Texas (5); L. Lohrbauer, B.C. Olliff, Jacksonville, Florida (5); J. Cooper, L. Snyder, A. van Breda, Alexandria, Virginia (5); K. Hassell, M.R. Nehler, Denver, Colorado (5); D.M. Paulson, F. Fulco, M. Hazelrigg, Richmond, Virginia (3); W. Smith, C. Fogarty, Spartanburg, South Carolina (4); S. Allen, Manhasset, New York (4); J. Godwin, Maywood, Illinois (4); T. Morris, C. Pedersen, San Diego, California (3); G. Wendell, L. Berkowitz, Upland, Pennsylvania (3); G. Rodgers, K. Rholl, Salt Lake City, Utah (2); S. Kaatz, V. Shah, Detroit, Michigan (2); J. Caprini, M. Verta, Evanston, Illinois (2); D. Green, L. Boggio, Chicago, Illinois (2); G.J. Johnson, B.N. Jahagirder, Minneapolis, Minnesota (2); M. Tidswell, Springfield, Massachusetts (1); A. Dunn, C. Caracta, New York (1); L. Schwartzberg, Memphis, Tennessee (1); M. Holguin, S. Bhat, Temple, Texas (1); R. Schein, Miami, Florida (1).

**Figure 1-Breakdown of patient populations in the DVT study and in the PE study**

**DVT study**

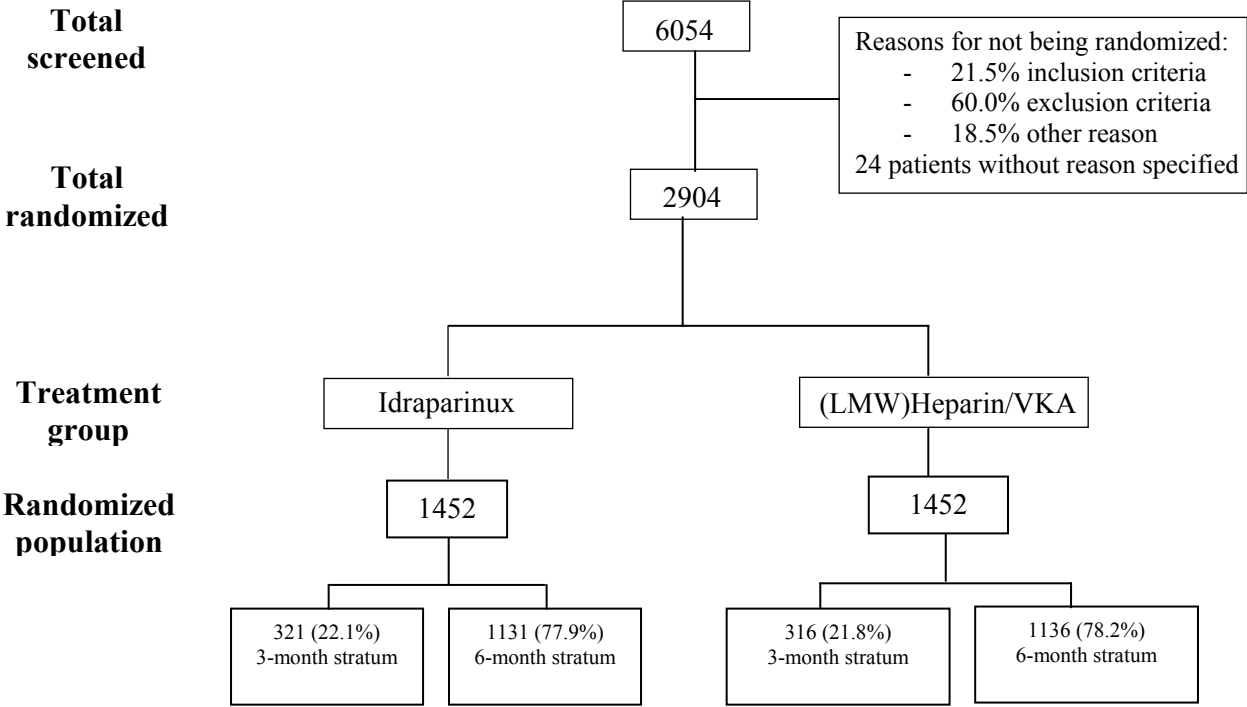

**PE study**

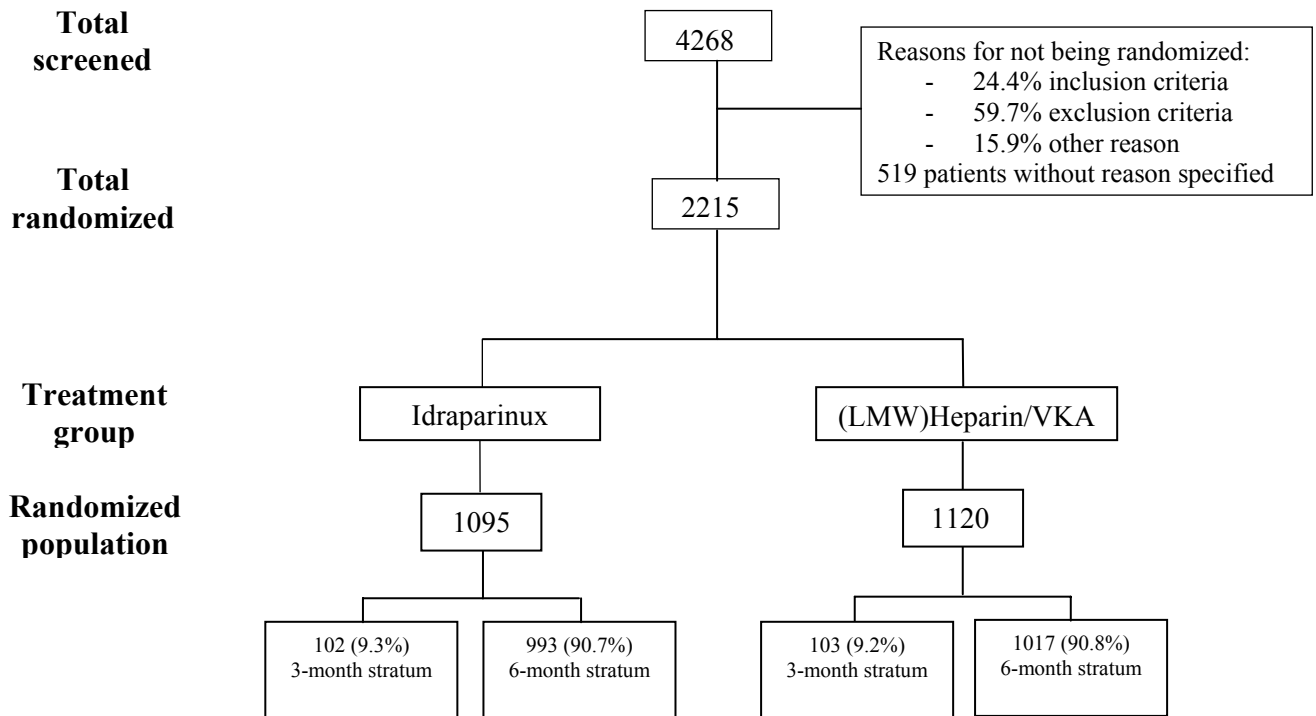

Supplement: nejm_buller_1094sa1.pdf [file nejm_buller_1094sa1.pdf]
